# Supplementary material for: A systematic literature review of individuals’ perspectives on privacy and genetic information in the United States
Source: PubMed Central journal article supplement (PMC6209148; doi:10.1371/journal.pone.0204417), 2018-10-31
Supplement: pone.0204417.s003.pdf [file pone.0204417.s003.pdf]

## **S2Table. GetPreCiSe Search Strategy**

### **Databases**

- ACM Digital Library
- AnthroSource 2.0 (American Anthropological Association)
- IEEE
- PubMed
- Web of Science (Social Sciences Index, Science Citation Index)
- Applied Social Sciences Index and Abstracts (ASSIA)
- International Bibliography of the Social Sciences (IBSS)
- PRISMA Database with HAPI Index
- PsycARTICLES
- Psychology Database
- PsycINFO
- Public Health Database
- Research Library
- WorldCat

### **Hand searching**

- Reference lists of recent, relevant systematic reviews and comprehensive narrative reviews
- Reference lists of publications included after the full-text review
- Table of Contents from relevant journal titles
- Publications from key authors

### **Journals**

- BMC Medical Ethics
- Genetics in medicine: official journal of the American College of Medical Genetics
- Public Health Genomics
- Journal of Medical Ethics
- American Journal of Bioethics
- The Journal of law, medicine & ethics: a journal of the American Society of Law, Medicine & Ethics
- Critical Studies in Media Communication
- Communication and Critical/Cultural Studies
- Communication, Culture, & Critique
- Journal of Health Communication.

### **Other**

- American College of Medical Genetics and Genomics Publications (<https://www.acmg.net>)
- G2P Research in Translational Genomics and Health Outcomes (<http://www.genomes2people.org/home>)
- EthicShare (<http://ethicshare.org>)
- HumGen International Database (<http://www.humgen.org>)
- PopGen Database (<http://www.popgen.info/home>)

## Search Strategy: PubMed

**Date** 5/18/2016

**Platform** PubMed

**Database** Medline

**s**

**Notes** Preliminary, scoping

| Search | Strategy                                                                                                                                                                                                                                                                  | Records   |
|--------|---------------------------------------------------------------------------------------------------------------------------------------------------------------------------------------------------------------------------------------------------------------------------|-----------|
| 1      | Search perception[tiab] AND genetics AND ethics                                                                                                                                                                                                                           | 70        |
| 2      | Search ("Attitude"[Mesh]) OR "Public Opinion"[Mesh]                                                                                                                                                                                                                       | 300,753   |
| 3      | Search "Biometric Identification"[Majr]                                                                                                                                                                                                                                   | 4,858     |
| 4      | Search ("Biometric Identification"[Mesh]) AND (("Attitude"[Mesh]) OR "Public Opinion"[Mesh])                                                                                                                                                                              | 20        |
| 5      | Search ("Privacy"[Mesh]) OR "Confidentiality"[Mesh]                                                                                                                                                                                                                       | 54,296    |
| 6      | Search (((("Privacy"[Mesh]) OR "Confidentiality"[Mesh])) AND "Biometric Identification"[Majr]                                                                                                                                                                             | 130       |
| 7      | Search (((("Privacy"[Mesh]) OR "Confidentiality"[Mesh])) AND ("databases, genetic"[mesh] OR "dna fingerprinting"[mesh]) Schema: syn                                                                                                                                       | 643       |
| 8      | Search "Perception/ethics"[MeSH Terms]                                                                                                                                                                                                                                    | 31        |
| 9      | Search ("Public Opinion"[MAJR]) AND "Genetic Research"[MAJR]                                                                                                                                                                                                              | 32        |
| 10     | Search (((("Privacy"[Mesh]) OR "Confidentiality"[Mesh])) OR ("Attitude"[Mesh]) OR "Public Opinion"[Mesh])                                                                                                                                                                 | 349,196   |
| 11     | Search (("databases, genetic"[mesh] OR "dna fingerprinting"[mesh])                                                                                                                                                                                                        | 48,693    |
| 12     | Search "databases, genetic"[mesh] OR "dna fingerprinting"[mesh]                                                                                                                                                                                                           | 48,693    |
| 13     | Search "Biometric Identification"[Mesh]                                                                                                                                                                                                                                   | 13,594    |
| 14     | Search ("Biometric Identification"[Mesh]) OR ("databases, genetic"[mesh] OR "dna fingerprinting"[mesh])                                                                                                                                                                   | 49,106    |
| 15     | Search Genetic Research"[Mesh]                                                                                                                                                                                                                                            | 252       |
| 16     | Search (("Genetic Research"[Mesh]) OR (("Biometric Identification"[Mesh]) OR ("databases, genetic"[mesh] OR "dna fingerprinting"[mesh])))                                                                                                                                 | 56,129    |
| 17     | Search (((("Surveys and Questionnaires"[Mesh]) OR "Attitude"[Mesh]) OR "Public Opinion"[Mesh]) OR "Informed Consent"[Mesh])                                                                                                                                               | 1,014,394 |
| 18     | Search ((((((("Surveys and Questionnaires"[Mesh]) OR "Attitude"[Mesh]) OR "Public Opinion"[Mesh]) OR "Informed Consent"[Mesh])) AND (((("Genetic Research"[Mesh]) OR ("Biometric Identification"[Mesh]) OR ("databases, genetic"[mesh] OR "dna fingerprinting"[mesh]))))) | 1,395     |
| 19     | Search ((((((("Surveys and Questionnaires"[Mesh]) OR "Attitude"[Mesh]) OR "Public Opinion"[Mesh]) OR "Informed Consent"[Mesh])) OR ("Privacy"[Mesh]) OR "Confidentiality"[Mesh])                                                                                          | 1,052,129 |
| 20     | Search (((((((("Surveys and Questionnaires"[Mesh]) OR "Attitude"[Mesh]) OR "Public Opinion"[Mesh]) OR "Informed Consent"[Mesh])) OR ("Privacy"[Mesh]) OR "Confidentiality"[Mesh])) AND (((("Genetic Research"[Mesh]) OR ("Biometric                                       | 2,277     |

|    |                                                                                                                                                                                                                                                                                                                                                                   |       |
|----|-------------------------------------------------------------------------------------------------------------------------------------------------------------------------------------------------------------------------------------------------------------------------------------------------------------------------------------------------------------------|-------|
|    | Identification"[Mesh]) OR ("databases, genetic"[mesh] OR "dna fingerprinting"[mesh]))))                                                                                                                                                                                                                                                                           |       |
| 21 | ((((((("Surveys and Questionnaires"[Mesh]) OR "Attitude"[Mesh]) OR "Public Opinion"[Mesh]) OR "Informed Consent"[Mesh])) OR ("Privacy"[Mesh]) OR "Confidentiality"[Mesh])) AND (((("Genetic Research"[Mesh]) OR ("Biometric Identification"[Mesh]) OR ("databases, genetic"[mesh] OR "dna fingerprinting"[mesh])))) OR (perception[tiab] AND genetics AND ethics) | 2,335 |

### Search Strategy: Web of Science

**Date** 5/18/2016  
**Platform** Web of Science  
**Database** SCI-EXPANDED, all years  
**s**  
**Notes** Preliminary, scoping

| Search | Strategy                                                                                                                                                                                                                | Records |
|--------|-------------------------------------------------------------------------------------------------------------------------------------------------------------------------------------------------------------------------|---------|
| 1      | TS=(perception OR perceive OR opinion OR attitude OR fear OR belief OR view) AND TS=(genetic OR biobank OR DNA OR genome) AND TS=(ethics OR sociology OR consent OR privacy OR confidentiality OR identity OR autonomy) | 1,950   |
| 2      | TS=public survey AND TS=genetic                                                                                                                                                                                         | 739     |
| 3      | TS="public perception" AND TS=genetic                                                                                                                                                                                   | 53      |
| 4      | TS=("perception" OR "public opinion" ) AND TS=(genetic OR genome OR DNA) AND TS=(ethic* OR privacy)                                                                                                                     | 115     |
| 5      | TS="human genome" AND TS="public perception"                                                                                                                                                                            | 3       |
| 6      | TS="belief AND TS="participating" AND TS="genetic"                                                                                                                                                                      | 81      |
| 7      | #1 OR #2 OR #3 OR #4 OR #5 OR #6                                                                                                                                                                                        | 2,725   |

### Search Strategy: ProQuest

**Date** 6/16/2016  
**Platform** ProQuest  
**Database** Applied Social Sciences Index and Abstracts (ASSIA), International Bibliography of the Social Sciences (IBSS), PRISMA Database with HAPI Index, PsycARTICLES, Psychology Database, PsycINFO, Public Health Database, Research Library  
**s**  
**Notes** Literature Test Set for Sociological Literature

| Search | Strategy                                                                                                                                                                                                           | Records |
|--------|--------------------------------------------------------------------------------------------------------------------------------------------------------------------------------------------------------------------|---------|
| 1      | su(autonomy OR privacy OR sharing OR disclosure OR identity OR confidentiality) AND su((perception OR attitude OR opinion OR fear OR preference OR concern)) AND su((genetic OR biobank OR DNA OR gene OR genome)) | 203     |

### Search Strategy for ACM Digital Library

**Date** 6/30/2016  
**Platform** ACM Digital Library  
**Collection** The ACM Guide to Computing Literature:  
**Notes**

| Search | Strategy                                                                                                                                                                         | Records |
|--------|----------------------------------------------------------------------------------------------------------------------------------------------------------------------------------|---------|
| 1      | (DNA gene genetic genome genomic) AND (private privacy confidential identity kin anonymous anonymity) AND (perception opinion poll survey perspective belief concern ethic fear) | 333     |

### Search Strategy for AnthroSource

**Date** 7/6/2016  
**Platform** Wiley Online Library / AnthroSource 2.0  
**Collection** Archive of all journals, newsletters, and bulletins of the American Anthropological Association.  
**Notes** Contacted webmaster@americananthro.org to download batch rather than single citation (7/6/16)  
 ti= Title; kw= Keyword

| Search | Strategy                                                                                                                                                                                          | Records |
|--------|---------------------------------------------------------------------------------------------------------------------------------------------------------------------------------------------------|---------|
| 1      | (private OR privacy OR individual OR confidential OR autonomy OR personhood) AND (genetic OR DNA OR genome OR biobank) AND (perception OR opinion OR poll OR survey OR concern OR fear OR belief) | 4,653   |
| 2      | kw: (concern OR fear OR belief)                                                                                                                                                                   | 26      |
| 3      | ti: (belief OR concern OR opinion OR perception OR perspective OR survey OR poll OR fear OR attitude)                                                                                             | 1,626   |
| 4      | kw: (private OR privacy OR individual OR confidential OR autonomy OR personhood OR self OR identity)                                                                                              | 301     |
| 5      | ti: (private OR privacy OR individual OR confidential OR autonomy OR personhood OR self OR identity)                                                                                              | 1,506   |
| 6      | kw: (genetics OR genetic OR HapMap OR DNA OR genome OR genomic OR genomics OR biobank OR biobanks OR bioethics)                                                                                   | 45      |
| 7      | ti: (genetics OR genetic OR HapMap OR DNA OR genome OR genomic OR genomics OR biobank OR biobanks)                                                                                                | 181     |
| 8      | kw: (concern OR fear OR belief) OR ti: (belief OR concern OR opinion OR perception OR perspective OR survey OR poll OR fear OR attitude) <b>(2 OR 3)</b>                                          | 1,637   |
| 9      | kw: (private OR privacy OR individual OR confidential OR autonomy OR personhood OR self OR identity) OR ti: (private OR privacy OR individual                                                     | 1,705   |

| Search | Strategy                                                                                                                                                                                                                                                                                                                                                                                                                                                                                                                                                                                                                                                                    | Records |
|--------|-----------------------------------------------------------------------------------------------------------------------------------------------------------------------------------------------------------------------------------------------------------------------------------------------------------------------------------------------------------------------------------------------------------------------------------------------------------------------------------------------------------------------------------------------------------------------------------------------------------------------------------------------------------------------------|---------|
|        | OR confidential OR autonomy OR personhood OR self OR identity) ( <b>4 OR 5</b> )                                                                                                                                                                                                                                                                                                                                                                                                                                                                                                                                                                                            |         |
| 10     | (kw: (concern OR fear OR belief) OR ti: (belief OR concern OR opinion OR perception OR perspective OR survey OR poll OR fear OR attitude)) OR (kw: (private OR privacy OR individual OR confidential OR autonomy OR personhood OR self OR identity) OR ti: (private OR privacy OR individual OR confidential OR autonomy OR personhood OR self OR identity)) ( <b>8 OR 9</b> )                                                                                                                                                                                                                                                                                              | 3,300   |
| 11     | (ethnography OR ethnology OR ethnologist OR bioethnology)                                                                                                                                                                                                                                                                                                                                                                                                                                                                                                                                                                                                                   | 34,845  |
| 12     | (kw: (concern OR fear OR belief) OR ti: (belief OR concern OR opinion OR perception OR perspective OR survey OR poll OR fear OR attitude)) OR (kw: (private OR privacy OR individual OR confidential OR autonomy OR personhood OR self OR identity) OR ti: (private OR privacy OR individual OR confidential OR autonomy OR personhood OR self OR identity)) OR (ethnography OR ethnology OR ethnologist OR bioethnology) ( <b>10 OR 11</b> )                                                                                                                                                                                                                               | 36,382  |
| 13     | ((kw: (concern OR fear OR belief) OR ti: (belief OR concern OR opinion OR perception OR perspective OR survey OR poll OR fear OR attitude)) OR (kw: (private OR privacy OR individual OR confidential OR autonomy OR personhood OR self OR identity) OR ti: (private OR privacy OR individual OR confidential OR autonomy OR personhood OR self OR identity)) OR (ethnography OR ethnology OR ethnologist OR bioethnology) ) AND (ti: (genetics OR genetic OR HapMap OR DNA OR genome OR genomic OR genomics OR biobank OR biobanks)) ( <b>12 AND 7</b> )                                                                                                                   | 56      |
| 14     | ((kw: (concern OR fear OR belief) OR ti: (belief OR concern OR opinion OR perception OR perspective OR survey OR poll OR fear OR attitude)) OR (kw: (private OR privacy OR individual OR confidential OR autonomy OR personhood OR self OR identity) OR ti: (private OR privacy OR individual OR confidential OR autonomy OR personhood OR self OR identity)) OR (ethnography OR ethnology OR ethnologist OR bioethnology) ) AND (ti: (genetics OR genetic OR HapMap OR DNA OR genome OR genomic OR genomics OR biobank OR biobanks)) OR kw: (genetics OR genetic OR HapMap OR DNA OR genome OR genomic OR genomics OR biobank OR biobanks OR bioethics) ( <b>13 OR 6</b> ) | 92      |

### Search Strategy: Communication & Mass Media Complete

**Date** 7/6/2016

**Platform** EBSCOhost

**Databases** Communication & Mass Media Complete

**Notes** SU= Subject Heading; KW= Author Supplied Keyword

| Search | Strategy                                            | Records |
|--------|-----------------------------------------------------|---------|
| S1     | SU (genetic OR DNA OR genome OR biobank OR genomic) | 785     |

|    |                                                                                                                                                                                        |        |
|----|----------------------------------------------------------------------------------------------------------------------------------------------------------------------------------------|--------|
| S2 | SU (trust OR attitude OR opinion OR concern OR privacy OR individuality OR personhood OR biocommerce OR perception OR identity OR sentiment OR discourse OR survey OR constructionism) | 43,986 |
| S3 | KW (genetic OR DNA OR genome OR biobank OR genomic)                                                                                                                                    | 280    |
| S4 | KW (trust OR attitude OR opinion OR concern OR privacy OR individuality OR personhood OR biocommerce OR perception OR identity OR sentiment OR discourse OR survey OR constructionism) | 14,578 |
| S5 | S1 OR S3                                                                                                                                                                               | 892    |
| S6 | S2 OR S4                                                                                                                                                                               | 51,862 |
| S7 | S5 AND S6                                                                                                                                                                              | 137    |

### Search Strategy: Modern Language Association

**Date** 7/6/2016

**Platform** ProQuest

**Databases** MLA International Bibliography

**e**

#### Notes

| Search | Strategy                                                                                                                                                                                          | Records |
|--------|---------------------------------------------------------------------------------------------------------------------------------------------------------------------------------------------------|---------|
| S1     | (genetic OR genome OR genomic OR DNA) AND (privacy OR private OR discourse OR opinion OR perception OR perspective)                                                                               | 104     |
| S2     | (genetic OR genome OR genomic OR DNA) AND (privacy OR private OR discourse OR opinion OR perception OR perspective OR attitude OR constructionism OR personhood)                                  | 106     |
| S3     | (genetic OR genome OR genomic OR DNA OR genetics) AND (privacy OR private OR discourse OR opinion OR perception OR perspective OR attitude OR constructionism OR personhood)                      | 136     |
| S4     | (genetic OR genome OR genomic OR DNA OR genetics OR biobank) AND (privacy OR private OR discourse OR opinion OR perception OR perspective OR attitude OR constructionism OR personhood OR belief) | 147     |
