# Supplementary material for: A systematic literature review of individuals’ perspectives on privacy and genetic information in the United States
Source: PLoS One. 2018 Oct 31;13(10):e0204417. doi: 10.1371/journal.pone.0204417 (PMC6209148; doi:10.1371/journal.pone.0204417)
Supplement: S2 Table — (XLSX) [file pone.0204417.s002.xlsx]

## Sheet: main extraction file
PMID	Quality	Internal reference #	Bibliography	Year of pub	Category1	Category2	Empirical Method -> Survey	Empirical Method -> Focus Group	Empirical Method -> Interview	Empirical Method -> Mixed methods	Empirical Method -> Experimental	Empirical Method -> Systematic review or meta-analysis	Empirical Method -> Other (COMMENT)	Type of respondent: -> Clinician/health care provider	Type of respondent: -> Researcher/research personnel (e.g., IRB)	Type of respondent: -> Patient/consumer	Type of pt/health condition	Type of respondent: -> Parent/caregiver	Type of respondent: -> General public	Type of respondent: -> Other (COMMENT)	Is privacy a major or minor focus?	US only?	State(s)	Includes non-white participants	Description (race/ethnicity)	White	Black/ AA	Hispanic	Others	NR	Total N contacted/sampled	Total Respondents/Completers (if applicable)	Questionnaire Published?	RESULTS address privacy or confidentiality directly?	Addresses Discrimination?	PRIVACY/DISCRIMINATION ELEMENTS IN QUESTIONNAIRE?
28190457	good	9000	Sanderson, Clayton, Brothers, Mercaaldo, et al. Public Attitudes toward Consent and Data Sharing in Biobank Research: A Large Multi-site Experimental Survey in the US.Am J Hum Genet. 2017 Mar 2;100(3):414-427	2017	biobanking	Informed Consent	survey										general clinic pts and others				Ma	Yes	National	Yes							82328	13000	no	yes	no
28486511	fair	9001	Haeusermann Open sharing of genomic data: Who does it and why? PLoS One. 2017 May 9;12(5):e0177158.	2017	dtc		survey										general clinic pts and others				Major focus	No		Yes							3884	550
28382417	fair	9002	Goodman et al. De-identified genomic data sharing: the research participant perspective. J Community Genet. 2017 Jul;8(3):173-181.	2017	biobanking	return of results	survey														majjor	Yes	Nationasl	Yes	AA, Asian, multi, white						450
not available	fair	6857	Weidman J Understanding Interdependent Privacy Concerns and Likely Use Factors for Genetic Testing: A Vignette Study	2016	Genetic testing		Survey												General public	mechanicla turk		Y	National	NR	NR						500	484	yes	yes	yes	The dependent variables were presented as follows. Likely usage: Carlton intends to sign up for the service and have his genome tested rather than not sign up for the service; Carlton’s intentions are to use the genetic service rather than any alternative means (such as see a geneticist, or other specialist in-person). Recommended usage (for others): John intends to recommend the service to his f…
26508568	fair	16	S. C. Sanderson, M. D. Linderman, S. A. Suckiel, G. A. Diaz, R. E. Zinberg, K. Ferryman, M. Wasserstein, A. Kasarskis and E. E. Schadt. Motivations, concerns and preferences of personal genome sequencing research participants: Baseline findings from the HealthSeq project. European Journal of Human Genetics. 2016. 24:14-20	2016	WGS					Mixed Methods			questionnaires plus interviews			Patient/consumer	general clinic pts and others			participants in HealthSeq	Minor focus	Yes	NY	Yes	AA, Hispanic, Asian, W, other	25	3	2	5: 2 (asian), 2 (more than one race), 1 (other, self-reported Turkish)		NR	35	Yes	yes	No	Considering the [return of results] option you prefer, please answer the following questions: I know the risks of each option. Do you have concerns about participating in this study and receiving your personal results from whole genome sequencing?: Concerns related to potential privacy issues about my data
26970385	fair	2691	M. L. Yushak, G. Han, S. Bouberhan, L. Epstein, M. P. DiGiovanna, S. S. Mougalian, T. B. Sanft, M. M. Abu-Khalaf, G. G. Chung, S. M. Stein, S. B. Goldberg, L. Pusztai and E. W. Hofstatter. Patient preferences regarding incidental genomic findings discovered during tumor profiling. Cancer. 2016. 122:1588-1597	2016	Genetic testing	Return of results	Survey									Patient/consumer	cancer patients			cancer patients	Minor focus	Yes	NR (CT area)	yes	white, nonwhite	322					855	413	yes	yes	yes	concerns about tumor profiling: Possibly reduce my chance to obtain health insurance Possibly reduce my chance to obtain health insurance Privacy of the results (concern that people other than your physician could find out the results). Also asks about sharing information with family under various conditions--incurable, etc.
27806054	fair	7079	M. A. Majumder, R. Cook-Deegan and A. L. McGuire. Beyond Our Borders? Public Resistance to Global Genomic Data Sharing. PLoS Biol. 2016. 14:e2000206	2016	Data sharing		Survey												General public	Mechanical Turk	Minor focus	Yes	National	Yes	Hispanic, W, AA, Asian, other	1025	73	101	120: 91 (asian) 29 (non-hispanic other)		NR	1319	No	Yes	No	We defined “privacy” as “a condition where others have limited access to information about you.” “Security” was defined as “the protections that are in place to keep your information from being seen by people who do not have permission.” Of the respondents, 73% were not at all to not very comfortable with their health information being accessed by academic researchers outside the US, compared to …
26928896	poor	309_8751	J. O. Robinson, T. M. Carroll, L. Z. Feuerman, D. L. Perry, L. Hoffman-Andrews, R. C. Walsh, K. D. Christensen, R. C. Green and A. L. McGuire. Participants and Study Decliners' Perspectives About the Risks of Participating in a Clinical Trial of Whole Genome Sequencing. J Empir Res Hum Res Ethics. 2016. 11:21-30	2016	WGS		Survey									Patient/consumer	primary care and cardiology			medseq project	Major focus	Yes	NR	Yes	other						514	202	No	yes	No	Decliners also cited ELSI-related risks as reasons for declining participation, including fear of insurance discrimination, psychological impact of return of results, and privacy concerns. Items making up trust scale included: I trust that neither my identity nor my genetic information will be shared with third parties without my permission. I feel comfortable allowing researchers to use my genet…
27653592	fair	7110	C. M. Condit, L. Shen, K. L. Edwards, D. J. Bowen, D. M. Korngiebel and C. O. Johnson. Participants' Role Expectations in Genetics Research and Re-consent: Revising the Theory and Methods of Mental Models Research Relating to Roles. J Health Commun. 2016. 21:16-24	2016	Genetic research (unspecified)	Informed Consent	Survey												General public	participants in long term cancer registry	Major focus	Yes	NR (Northwest Cancer Genetics Registry)	Yes	W, Asian, AA, multi	423	4		22: 15 (mulicultural) 7 (asian)	1	3352	450	No	Yes	No	Participants estimated the likelihood of certain events occurring in genetic research studies in the next 5 years (1 = “very likely,” 2 = “somewhat likely,” 3 = “neither likely nor unlikely,” 4 = “somewhat unlikely,” and 5 = “very unlikely”): “a research participant would be personally identified in a study involving de-identified data by someone other than the researchers”; “a research participa…
27832194	poor	7072	C. Cheung, M. J. Bietz, K. Patrick and C. S. Bloss. Privacy Attitudes among Early Adopters of Emerging Health Technologies. PLoS One. 2016. 11:e0166389	2016	WGS				Interview										General public	early tech adopters	Major focus	NR	NR (conference attendees)	Yes	W, non-white						NR	18	No	Yes	Yes	Key findings have been organized into four themes: (1) personal data privacy is important but difficult to achieve; (2) respondents want control over their personal information; (3) discrimination based on personal data is a significant concern; and (4) respondents generally believe the benefits of contributing personal data to science outweigh the privacy risks.
26752784	fair	7188	B. D. Freeman, D. Bolcic-Jankovic, C. R. Kennedy, J. LeBlanc, A. Eastman, J. Barillas, C. M. Wittgen, K. Indsey, R. S. Mahmood and B. R. Clarridge. Perspectives of Decisional Surrogates and Patients Regarding Critical Illness Genetic Research. AJOB Empir Bioeth. 2016. 7:39-47	2016	Genetic research (unspecified)		Survey											Parent/caregiver		surrogates of ICU patients	Minor focus	Yes	MO, TX	Yes	AA, W	316	85		32		568+285	439+192	No	Yes	Yes	Over one-half of respondents expressed worry regarding lack of confidentiality of genetic data. Disclosure of this information to insurance companies appeared particularly problematic with 60% stating that this was a “big” or “moderate” worry. Similarly, the possibility that genetic data might lead to some form of discrimination constituted a “big” or “moderate” worry for 45% of respondents. aske…
not available	fair	6277	E. A. Rauscher, C. Hesse, S. Miller, W. Ford and E. L. Youngs. Privacy and Family Communication about Genetic Cancer Risk: Investigating Factors Promoting Women’s Disclosure Decisions. Journal of Family Communication. 2015. 15:368-386	2015	Genetic testing		Survey									Patient/consumer	pts screened for cancer risk				Minor focus	Yes	National	Yes	African American, Hispanic, Other	166	1	2	1	1	NR	175	No	yes	No	Not all items listed--those listed as examples were “I do not discuss private information with other people” “There are specific people I avoid disclosing private information to”.
25825819	good	22	A. T. Ewing, L. A. H. Erby, J. Bollinger, E. Tetteyfio, L. J. Ricks-Santi and D. Kaufman. Demographic Differences in Willingness to Provide Broad and Narrow Consent for Biobank Research. Biopreservation and Biobanking. 2015. 13:98-106	2015	Informed consent	Biobanking/Specimen donation				Mixed									General public		Major focus	Yes	national	Yes	AA, Hispanic, W	1529	675	708	149		5412	3061	Yes	yes	Yes	Opinions: more comfortable that genetic information collected in the study could not be used against me (% Agree) 2363 (79%) 2368 (79%) It is not possible to maintain my privacy these days (% Agree) 1770 (60) 1778 (60) I limit my Internet use because of privacy concerns (% Agree) 1527 (51) 1480 (50) Breaches of my privacy are inevitable. (% Agree) 1865 (63) 1880 (64) How concerned are you about t…
24616359	fair	121_328_356	M. D. Burstein, J. O. Robinson, S. G. Hilsenbeck, A. L. McGuire and C. C. Lau. Pediatric data sharing in genomic research: attitudes and preferences of parents. Pediatrics. 2014. 133:690-697; A. L. McGuire, J. M. Oliver, M. J. Slashinski, J. L. Graves, T. Wang, P. A. Kelly, W. Fisher, C. C. Lau, J. Goss, M. Okcu, D. Treadwell-Deering, A. M. Goldman, J. L. Noebels and S. G. Hilsenbeck. To share or…	2014	Data sharing					mixed methods						Patient/consumer	pediatric brain tumor and controls, pediatric autism, adult and pediatric epilepsy, adult and pediatric liver cancer, and adult pancreatic cancer	Parent/caregiver			Minor focus	Yes	TX	Yes	W, non-Hispanic minority, Hispanic	170		52	64 (non-hispanic minority)		378	323	Yes	yes	Yes	Most concerned about when sharing genetic information Health insurance discrimination Fear of finding out information about myself or my family Having my identity revealed “Which of the following is most important?” Advancing research Protecting privacy
24737606	fair	29	D. Rogith, R. A. Yusuf, S. R. Hovick, S. K. Peterson, A. M. Burton-Chase, Y. S. Li, F. Meric-Bernstam and E. V. Bernstam. Attitudes regarding privacy of genomic information in personalized cancer therapy. Journal of the American Medical Informatics Association. 2014. 21:E320-E325	2014	genetic testing		Survey									Patient/consumer	Breast Cancer patients				Major focus	Yes	TX	Yes	white (70%), non-white	70				2	308	100	Yes	yes	No	Molecular testing results are sensitive and should be protected. I am concerned that my insurer will discriminate against me based on my test results. I am concerned that my employer will discriminate against me based on my test results. i am concerned about the security of my data from the molecular tests conducted by government agencies (such as CDC). am concerned about the security of my data …
24926856	fair	3177	D. M. Scott, E. Nwulia, J. Kwagyan, G. Cain, V. J. Marshall, N. Kalu, A. Ewing and R. E. Taylor. Genetic Testing for the Susceptibility to Alcohol Dependence: Interest and Concerns in an African American Population. Genetic Testing and Molecular Biomarkers. 2014. 18:538-545	2014	Genetic Testing		Survey												general public	African Americans	Minor focus	Yes	D.C. area	Yes	AA		304				NR	304	Yes--Genetic Psycho-Social Implication (GPSI) questionnaire	yes	Yes	concerns influencing willingness to test: privacy or confidentiality effect on insurance labeling by family/friends or doctors
24713606	fair	6982	C. B. Nagaraj, E. Rothwell, K. Hart, S. Latimer, J. D. Schiffman, J. R. Botkin. Attitudes of parents of children with serious health conditions regarding residual bloodspot use. Public Health Genomics. 2014. 17:141-8	2014	biobanking/specimen donation (blood spot)		Survey											Parent/caregiver		PKU, leukemia	Major focus	NR	NR (contacted via registry or advocacy group)	Yes	W, AA, Asian, Native American, other	48	0	0	1	0	NR	49	Yes	Yes	No	Would it be alright to use these leftover samples for research with parent’s permission and with the baby’s name attached? Would it be alright to use these leftover samples for research with parent’s permission and without the baby’s name attached Would it be alright to use these leftover samples for research without parent’s permission and with the baby’s name attached Would it be alright to use…
23743552	poor	6921	A. J. Goldenberg, D. S. Dodson, M. M. Davis, B. A. Tarini. Parents' interest in whole-genome sequencing of newborns. Genet Med. 2014. 16:78-84	2014	Genetic research (unspecified)	wgs	Survey											Parent/caregiver			Major focus	Yes	National sample	Yes	W, AA, Hispanic						2798	1539	No	Yes	Yes	Factors influencing interest in WGS: Privacy of the test results Use of the test results to discriminate against my child Use of the test results for research without my permission Next, participants who received the NBS scenario were also asked a second question regarding their interest in WGS through their state but with the following text added: Imagine that your state wants to store the infor…
23560882	poor	312	J. M. Bollinger, R. C. Green and D. Kaufman. Attitudes about regulation among direct-to-consumer genetic testing customers. Genet Test Mol Biomarkers. 2013. 17:424-8	2013	Genetic testing (DTC)		Survey												general public	DTC consumers	Major focus	Yes	NR	Yes	W, AA, Asian, Hispanic, American Indian/Alaska Native, other						3167	1046	No	yes	No	‘‘In thinking about [the company’s] service, I am confident my privacy has been protected.’’ Additionally, compared to the information in their medical record, 36% thought that the privacy of their genetic and personal health information collected by the company was better protected; 4% thought that the data were less protected; 38% thought that the protections were similar; and 23%were unsure of…
22241102	fair	736_945	K. L. Edwards, A. A. Lemke, S. B. Trinidad, S. M. Lewis, H. Starks, K. W. Snapinn, M. Q. Griffin, G. L. Wiesner and W. Burke. Genetics researchers' and IRB professionals' attitudes toward genetic research review: a comparative analysis. Genet Med. 2012. 14:236-42; A. A. Lemke, S. B. Trinidad, K. L. Edwards, H. Starks and G. L. Wiesner. Attitudes toward genetic research review: results from a nati…	2012	Genetic research (unspecified)	return of results	Survey								Researcher/research personnel (e.g., IRB)					IRB, genomic researchers	Major focus	Mixed	NR (>90% US)	NR	NR					559	2777 (IRB) 4908 (genetics researchers)	559	No	yes	No	How likely is it that a research participant would be personally identified in a study involving coded genetic data? How likely is it that a research participant would be harmed as a result of identification from coded genetic data? How likely is it that a federal agency (e.g., Homeland Security) or other law enforcement agency might compel investigators to disclose information about genetic rese…
22250018	fair	3789	J. R. Botkin, E. Rothwell, R. Anderson, L. Stark, A. Goldenberg, M. Lewis, M. Burbank and B. Wong. Public Attitudes Regarding the Use of Residual Newborn Screening Specimens for Research. Pediatrics. 2012. 129:231-238	2012	Biobanking/specimen donation (NBS)		survey												General public		Major focus	Yes	TX, CO, UT, NM, AZ, OR, MT, NV	Yes	W, AA, Asian/Native Hawaiian, Native American	2268	875		549: 143 (native american), asian/native hawaiian/other (406)	163	NR	3855	no	yes	No	A short paragraph informed participants that removing identifiers would increase privacy protections but, if identifying information is kept with the samples, important results about the infant’s health could be returned to the parents. When asked which approach is more appropriate, 64% responded that allowing notification of parents of results was more important than providing greater privacy pr…
22532433	poor	319	H. K. Tabor, J. Stock, T. Brazg, M. J. McMillin, K. M. Dent, J. H. Yu, J. Shendure and M. J. Bamshad. Informed consent for whole genome sequencing: a qualitative analysis of participant expectations and perceptions of risks, benefits, and harms. Am J Med Genet A. 2012. 158a:1310-9	2012	Genetic research (unspecified)	wgs			Interview								Miller Syndrome	Parent/caregiver			Minor focus	Yes	NR	NR	NR					9	NR	9	No	yes	No	Participants were asked whether or not they were concerned about risks to confidentiality and privacy, and if so to describe their concerns. All nine of the participants stated that they were not concerned about possible risks to confidentiality and privacy....Members of both families acknowledged the possible increased risk to their privacy due to their participation.
22488457	fair	3817	D. Duquette, C. Langbo, J. Bach and M. Kleyn. Michigan BioTrust for Health: Public Support for Using Residual Dried Blood Spot Samples for Health Research. Public Health Genomics. 2012. 15:146-155	2012	Biobanking/Specimen donation (NBS)					mixed methods									General public		Minor focus	Yes	MI	Yes	W, Hispanic, AA, Arab, Native American	35	16	11	16: 10 (Arab/Chaldean descent), Native american (6)	9	NR	87	No	yes	Yes	What are your initial thoughts about the idea of establishing a BioTrust to use Michigan dried blood spots for medical research? Do you see any benefits or drawbacks in having a large collection of samples available for population health research? What types of research using dried blood spots do you feel would be acceptable? What kinds of researchers should be allowed to request samples? Univers…
22405414	good	6890_7076	T. W. Chan, S. Mackey, D. G. Hegney. Patients' experiences on donation of their residual biological samples and the impact of these experiences on the type of consent given for the future research use of the tissue: a systematic review. Int J Evid Based Healthc. 2012. 10:9-26	2012	Biobanking/specimen donation							Systematic review or meta-analysis									Minor focus	NA	NA	NA	NA						NA	NA	NA
23181193	poor	6878	K. B. Brothers, E. W. Clayton. Parental Perspectives on a Pediatric Human Non-Subjects Biobank. AJOB Prim Res. 2012. 3:21-29	2012	Biobanking/specimen donation				Interview									Parent/caregiver			Major focus	Yes	TN	Yes	Hispanic						NR	65	No	Yes	No	Vanderbilt Does a Good Job of Keeping Parent’s Medical Record Private Vanderbilt Does a Good Job of Keeping Child’s Medical Record Private Prompted Concerns: Privacy of Medical Record Information Privacy of Genetic Information
21487211	fair	155_736	Lemke Attitudes toward Genetic Research Review: Results from a Survey of Human Genetics Researchers 2011; K. L. Edwards, A. A. Lemke, S. B. Trinidad, S. M. Lewis, H. Starks, K. W. Snapinn, M. Q. Griffin, G. L. Wiesner and W. Burke. Genetics researchers' and IRB professionals' attitudes toward genetic research review: a comparative analysis. Genet Med. 2012. 14:236-42	2011
22065592	fair	769_vanderbilt	K. B. Brothers, D. R. Morrison and E. W. Clayton. Two large-scale surveys on community attitudes toward an opt-out biobank. Am J Med Genet A. 2011. 155a:2982-90	2011	Biobanking/Specimen donation		Survey												General public		Major focus	Yes	TN	Yes	AA, Asian, PI, American Indian, other						25450	4050	yes	yes	no	How confident are you that your identity is protected when genetic information is used for research? DNA databanks are fine as long as all identifying information is removed. Opt-In/Out questions
22065592	good	769_community	K. B. Brothers, D. R. Morrison and E. W. Clayton. Two large-scale surveys on community attitudes toward an opt-out biobank. Am J Med Genet A. 2011. 155a:2982-90	2011	Biobanking/Specimen donation		Survey												General public		Major focus	Yes	TN	Yes	AA, Asian, PI, American Indian, other	311	184	182	167: 8 (asian or PI), 7 (american indian), 154 (other)	360	11188	1022	yes	yes	no	How confident are you that research hospitals such as Vanderbilt Medical Center do a good job of protecting patients 'medical information? How confident are you that your identity is protected when genetic information is used for research? Opt-In/Out questions
21595007	fair	2	E. A. Nwulia, M. M. Hipolito, S. Aamir, W. B. Lawson and J. I. Nurnberger, Jr.. Ethnic disparities in the perception of ethical risks from psychiatric genetic studies. Am J Med Genet B Neuropsychiatr Genet. 2011. 156b:569-80	2011	Genetic research (unspecified)		Survey									Patient/consumer	bipolar disorder, suspected bipolar			participants in the US Bipolar Genome Study	Minor focus	Yes	IN, MD, IL, CA, PA, MS, D.C.	Yes	AA, white	1065	188				1253	1253	No	yes	Yes	How concerned would you be about the following?’’ The six items were phrased as follows: (a) difficulty getting medical insurance; (b) difficulty getting a job; (c) being labeled as crazy or inferior; (d) loss of privacy; (e) that the information would be used to discourage you from having children; and (f) that the information would be used to discriminate against your race or ethnic group
20535021	fair	4105	S. B. Trinidad, S. M. Fullerton, J. M. Bares, G. P. Jarvik, E. B. Larson and W. Burke. Genomic research and wide data sharing: Views of prospective participants. Genetics in Medicine. 2010. 12:486-495	2010	Data sharing			Focus Group								Patient/consumer		Parent/caregiver	general public	ACT participants, surrogate decision makers, health insurance plan members	Major focus	Yes	WA-area	Yes	W, Indian/NA, Asian, AA, Hawaiian/PI	70	4		10: 1(indian/alska native), 8(asian native), 1 (hawaiian, pacific islander)	1	969	79	Yes	yes	Yes	If you were a participant in a genetic study at Group Health, a what would you think if the researchers wanted to share your de-identified information: • With other Group Health researchers? • Outside Group Health, with researchers who are collaborating with Group Health (e.g., from the University of Washington)? • Outside of Group Health and its research partnerships: – With other non-profit res…
20805700	fair	62	A. A. Lemke, W. A. Wolf, J. Hebert-Beirne and M. E. Smith. Public and biobank participant attitudes toward genetic research participation and data sharing. Public Health Genomics. 2010. 13:368-77	2010	Biobanking/Specimen donation			Focus Group											General public	some NuGene participants	Minor focus	Yes	IL (primarily)	Yes	W, AA, Hispanic	24	17		6	2	NR	49	Yes; discussion questions in table 1	yes	Yes	concern about privacy; trust in research on 5 pt scale Focus group: 1. What comes to mind when you think of genetic research data? 2. What might be some reasons that a person would participate in genetic research? 3. What might be some reasons that a person would not participate in genetic research? 4. How do you feel about participating in a genetic research study? 5. What kinds of information w…
20697289	fair	6869	L. M. Beskow, J. Y. Friedman, N. C. Hardy, L. Lin, K. P. Weinfurt. Simplifying informed consent for biorepositories: stakeholder perspectives. Genet Med. 2010. 12:567-72	2010	Biobanking/specimen donation	Informed Consent				Mixed methods					Researcher/research personnel (e.g., IRB)	Patient/consumer				IRB, Murdock study investigators, diabetes pts	Minor focus	Yes	NC	Yes	W, other, Hispanic	72			12		NR	84	Yes (consent form)	Yes	No	As you go through the form this time, we would like you to highlight the sentences that—in your opinion—contain the most important information about taking part in a biorepository. In other words, highlight the sentences that have information that would matter most to you, if you were thinking about taking part in a biorepository. All participatns highlighted sentences re privacy protection inclu…
19332583	fair	1042	M. Ruiz-Canela, J. I. Valle-Mansilla and D. P. Sulmasy. Researchers' preferences and attitudes on ethical aspects of genomics research: a comparative study between the USA and Spain. J Med Ethics. 2009. 35:251-7	2009	Genetic research (unspecified)		Survey								Researcher/research personnel (e.g., IRB)						Minor focus	Mixed; US and Spain	NR	NR	NR for US					204	495	204	No	yes	No	What do you think about the risks involved in research with genetic information? (a) The risks are similar to those with other health data. (b) The risks are higher than those with other health data. (c) The risks depend on the genes and diseases studied. (d) Generally, the risks can be considered minimal. Genomic information is more sensitive than other types of medical information. It also has …
19161150	fair	1059	K. E. Ormond, A. L. Cirino, I. B. Helenowski, R. L. Chisholm and W. A. Wolf. Assessing the understanding of biobank participants. Am J Med Genet A. 2009. 149a:188-98	2009	Biobanking/Specimen donation				Interview							Patient/consumer				Participants in NuGene Biobank	Major focus	Yes	IL-area	yes	NR					109	200	109	Yes	yes	Yes	A16: Because I am participating in a genetics research study, it is possible that the study sponsor, various government agencies, or others who are not directly involved in my care could view my medical records* What do you see as being the purpose of the research study [NUgene]? * What do you see as the benefits of participation? * What do you see as the risks? * How likely do you see those risk…
19346960	good	4362	D. Kaufman, J. Murphy, L. Erby, K. Hudson and J. Scott. Veterans' attitudes regarding a database for genomic research. Genetics in Medicine. 2009. 11:329-337	2009	Biobanking/Specimen donation		Survey												General public	Veterans	Major focus	Yes	GA, NY, CO, TX	Yes	White, black, Hispanic	746	93	36	56		4193	3067	Yes	yes	Yes	Protecting my privacy is very important to me I would be concerned the information from the program could be used against me I would be concerned about the government having my samples and information
19595370	fair	4283_44_296	A. J. Goldenberg, S. C. Hull, J. R. Botkin and B. S. Wilfond. Pediatric Biobanks: Approaching Informed Consent for Continuing Research After Children Grow Up. Journal of Pediatrics. 2009. 155:578-583 A. J. Goldenberg, S. C. Hull, B. S. Wilfond and R. R. Sharp. Patient Perspectives on Group Benefits and Harms in Genetic Research. Public Health Genomics. 2011. 14:135-142; S. C. Hull, R. R. Sharp, J…	2009	Biobanking/Specimen donation		Survey									Patient/consumer	pediatrics				Major focus	Yes	NC, MD, AZ, UT-area	Yes	Black/African American, Asian American, American Indian, Native Hawaiian/Pacific Islander, Other	898	190		93: 20 (asian american), 20 (American Indian), 4 (native hawaiian/pacific islander), 49 (other)	5	1395	1186	Yes	yes	Yes	A5. Can you tell me the number one thing you would want to know before giving a blood sample for genetic research? 1. WHAT DISEASE IS BEING STUDIED? 2. WHO IS DOING THE RESEARCH? 3. WILL I GET THE RESULTS? 4. WHAT ARE THE RISKS? 5. CONFIDENTIALITY ISSUE C1a. In the first situation, suppose that your name is removed from both the blood sample and from the information from your medical records so y…
18417970	poor	1135	C. S. Skinner, J. M. Schildkraut, B. Calingaert, C. Hoyo, S. S. Crankshaw, L. Fish, L. Susswein, C. Jasper and L. Reid. Factors associated with African Americans' enrollment in a national cancer genetics registry. Community Genet. 2008. 11:224-33	2008	Genetic research (unspecified)	Research recruitment/enrollment			Interview							Patient/consumer	cancer				Minor focus	Yes	NC, D.C.,	Yes	African American		262				545	262	No	yes	Yes	(a) ‘You do not believe that your information would be kept private’; (b) ‘If you answer questions about cancer, someone might see your answers and use this information against you’; (c) ‘You just don’t trust researchers’; and (d) ‘You think being in the Cancer Genetics Network might lead to discrimination from groups like Medicaid or insurance companies’.
18197056	fair	1157	A. L. McGuire, J. A. Hamilton, R. Lunstroth, L. B. McCullough and A. Goldman. DNA data sharing: research participants' perspectives. Genet Med. 2008. 10:46-53	2008	Data sharing			Focus Group								Patient/consumer	Epilepsy			participants in sequencing study, with and without epilepsy	Major focus	Yes	TX	Yes	NR (W or other)	15					140	15	Yes:	yes	Yes	Based on your understanding of what you agreed to when you consented to participate in the study, who do you think the results of your genetic analysis (your DNA code) can be given to? Is there anybody who you would not want to be able to obtain the results of your genetic analysis? Who and why not? What concerns, if any, do you have about sharing your DNA data? Prompt: Are there concerns that yo…
18694125	fair	1100	D. A. Leiman, N. Lorenzi, J. Wyatt, A. S. Doney and T. Rosenbloom. US and Scottish Health Professionals attitudes toward DNA biobanking. AMIA Annu Symp Proc. 2007. #volume#:1027	2007	Biobanking/Specimen donation		Survey							Clinician/health care provider							Minor focus	Mixed; US and Scotland	TN	NR	NR					81	179	81	No	yes	No	The database would not be secure. Information from a DNA database might be sold even if the creators say the data is private. Information from a DNA database might be sold even if the creators say the data is private.
16650074	poor	1367	K. A. Kaphingst, J. M. Janoff, L. N. Harris and K. M. Emmons. Views of female breast cancer patients who donated biologic samples regarding storage and use of samples for genetic research. Clin Genet. 2006. 69:393-8	2006	Biobanking/specimen donation				Interview							Patient/consumer	Breast cancer				Minor focus	Yes	MA-area	Yes	W, AA, Asian/PI	22	2		2: 1(asian/ pacific islander), 1 (unknown)		143	26	No	yes	Yes	When prompted specifically about the issue of privacy, some participants expressed concerns related to insurance coverage or employment; none had concerns about physicians or researchers seeing their information. A few described concerns that privacy protections might slow research.
16484903	fair	6913	B. D. Freeman, C. R. Kennedy, C. M. Coopersmith, B. A. Zehnbauer, T. G. Buchman. Genetic research and testing in critical care: surrogates' perspective. Crit Care Med. 2006. 34:986-94	2006	Genetic testing		Survey											Parent/caregiver		surrogate decision makers for ICU pts	Minor focus	Yes	MO	Yes	AA		25			92	146	117	Yes	Yes	Yes	How likely would you be to allow your family member to have a gene test if your family member’s employer could get the results of these tests? How likely would you be to allow your family member to have a gene test if your family member’s health insurance company could get the results of these tests? How likely would you be to allow your family member to have a gene test if your family member’s l…
14501835	fair	5176	J. L. Bevan, J. A. Lynch, T. N. Dubriwny, T. M. Harris, P. J. Achter, A. L. Reeder and C. M. Condit. Informed lay preferences for delivery of racially varied pharmacogenomics. Genetics in Medicine. 2003. 5:393-399	2003	Pharmacogenetic testing			focus group											General public		Major focus	Yes	GA	Yes	W, AA, Hispanic, multiracial	24	61	7	12 (multicultural)		NR	104	No	yes	Yes	Privacy represented concerns that an individual, organization, or group of people would violate the privacy of individuals under an option plan and use their medical information for their own purposes. Seven privacy categories were developed to capture the range of comments: insurers, pharmaceutical companies, doctors, other health care industries (i.e., hospitals, or any mention of “health” or “…
not available	poor	7063	M. A. and Hornung Rothstein. Public Attitudes about Pharmacogenomics. Public Attitudes about Pharmacogenomics, in Pharmacogenomics: Social, Ethical, and Clinical Dimensions. 2003. 1:3-27	2003	Pharmacogenomic testing		Survey												General public		Minor focus	Yes	National	Yes	AA, W, Hispanic, Asian						NR	1796	No	Yes	Yes	willing to test given anonymity or different levels of sharing data effects of sharing with employer, insurance companies
14630378	poor	7028	H. S. Thompson, H. B. Valdimarsdottir, L. Jandorf, W. Redd. Perceived disadvantages and concerns about abuses of genetic testing for cancer risk: differences across African American, Latina and Caucasian women. Patient Educ Couns. 2003. 51:217-27	2003	genetic testing				Interview							Patient/consumer				Latina, African American recruited through East Harlem Partnership for CancerAwareness	Minor focus	Yes	NY	Yes	AA, Hispanic, W						513	273	No	Yes	Yes	Perceived disadvantages: results wont stay confidential results used to treat people unfairly show my ethnic group is not as good as others
11839956	poor	1875	E. S. Tambor, B. A. Bernhardt, J. Rodgers, N. A. Holtzman and G. Geller. Mapping the human genome: an assessment of media coverage and public reaction. Genet Med. 2002. 4:31-6	2002	Genetic research (unspecified)					mixed methods									general public		Minor focus	Yes	MD	yes	W, AA						965	407	No	yes	Yes	Analysis of media reporting and interviews with consumers about genome mapping A total of 61.3% of all consumers mentioned at least one possible negative outcome of mapping the human genome. The most frequently mentioned were privacy violations/discrimination (15.7%) and cloning (13.5%). With regard to possible ethical issues resulting from the mapping of the human genome, privacy concerns (43% o…
9628712	poor	2199	J. R. Botkin, W. M. McMahon, K. R. Smith and J. E. Nash. Privacy and confidentiality in the publication of pedigrees: a survey of investigators and biomedical journals. Jama. 1998. 279:1808-12	1998	Genetic research (pedigree)					Mixed methods					Researcher/research personnel (e.g., IRB)					journal editors, researchers	Major focus	Mixed (jnl editors & authors could be global)	NR	NR	NR						252	191	No	yes	No	Investigators..have you purposely masked or altered aspects of the published pedigree in order to maintain confidentiality of family members What has been your personal level of concern over subject confidentiality in the publication of pedigrees? Do you think there are any problems with subject confidentiality related to the publication of pedigrees in biomedical jnls? Editors does your jnl have…
11657307	poor	1946	D. C. Wertz. The difficulties of recruiting minorities to studies of ethics and values in genetics. Community Genet. 1998. 1:175-9	1998	Genetic research (unspecified)		Survey												General public	THIS STUDY ONLY REPORTS PERCEPTIONS OF THE GEN PUBLIC, THOUGH IT LISTS OTHER STAKEHOLDERS	Minor focus	Yes	NR	Yes	African American, Asian, Hispanic, Native American						1000	988	No	yes	No	questions about attitudes toward individual privacy--44% of the total group would protect the privacy of a client who did not want to share genetic information with relatives at risk; 30% of African Americans (compared with 19% of the total group) thought the doctor should go out and find the patient’s relatives and tell them even if they did not ask; 37% (as compared with 27% of the total group)…
24786355	fair	9005	Quinn. Contrasting the ethical perspectives of biospecimen research among individuals with familial risk for hereditary cancer and biomedical researchers: implications for researcher training. Genet Test Mol Biomarkers. 2014 Jul;18(7):467-73. d	2014	biobanking/specimen donation			Focus Group							Researcher/research personnel (e.g., IRB)	Patient/consumer	cancer				Minor focus	yes		yes	AA, asian, white, multi						NR	72	no	yes	yes
23893769	fair	9004	Thiel	2013	biobanking/specimen donation	Informed Consent				mixed methods									general public			Yes	MI	Yes							NR	393	no	yes	no
22438108	fair	9006	Lemke . Biobank participation and returning research results: perspectives from a deliberative engagement in South Side Chicago. Am J Med Genet A. 2012 May;158A(5):1029-37.	2012	biobanking/specimen donation	return of results				mixed methods								Parent/caregiver		parent	Minor focus	Yes	IL	Yes	AA						NR	45	no	yes	yes
22087353	fair	9007	Goddard KA, Smith KS, Chen C, McMullen C, Johnson C. Biobank Recruitment: Motivations for Nonparticipation. Biopreserv Biobank. 2009;7(2):119-21	2009	biobanking/specimen donation											Patient/consumer					Major focus	Yes	WA, OR	Yes	minority						NR	500	No	Yes	No
19385847	poor	6933	P. R. Helft, V. L. Champion, R. Eckles, C. S. Johnson, E. M. Meslin. Cancer patients' attitudes toward future research uses of stored human biological materials. J Empir Res Hum Res Ethics. 2007. 2:15-22	2007	biobanking/specimen donation		Survey									Patient/consumer	cancer				Minor focus	Yes	IN	Yes	W, AA	361	273	No	Yes	Yes	We asked if subjects were concerned about privacy after contributing leftover tissue We asked how concerned subjects were with the privacy of their donated tissue from “not at all concerned” to “very much concerned we asked subjects whether general concerns about privacy, concerns about insurance, or concerns about their employment affected their level of concern about privacy. We asked subjects …	yes	NO	NO
23660530	fair	332_588	Platt. Public Preferences Regarding Informed Consent Models for Participation in Population-based Genomic Research. Kauffman Public Opinion about the Importance of Privacy in Biobank Research	2014	Biobanking/Specimen donation		Survey												general public		Major focus	Yes	National	Yes	AA, W, Hispanic, American Indian/Alaska Native, Asian American, multi	7978	4659	No	Yes	Yes	general questions were asked about privacy. Concerned about Privacy of Their Medical Information Concerned about Protecting Their Privacy in the Study Concerned about Study Researchers Having Their Samples and Information Concerned about Government Having Their Samples and Information Afraid that Data Collected by the Study Could Be Used against Them ‘‘If I Could Not Be Identified, I Would Be Wil…	No	informed by the focus groups in studies 4252
26583683	good	321	N. A. Garrison, N. A. Sathe, A. H. Antommaria, I. A. Holm, S. C. Sanderson, M. E. Smith, M. L. McPheeters and E. W. Clayton. A systematic literature review of individuals' perspectives on broad consent and data sharing in the United States. Genet Med. 2015. #volume#:#pages#	2015	Informed consent	Data sharing						Systematic review or meta-analysis							General public		Minor focus	NA	NA	NA	NA						NA	NA	NA
25938669	poor	7312	H. G. Skinner, L. Calancie, M. B. Vu, B. Garcia, M. DeMarco, C. Patterson, A. Ammerman and J. C. Schisler. Using community-based participatory research principles to develop more understandable recruitment and informed consent documents in genomic research. PLoS One. 2015. 10:e0125466	2015	Research recruitment/enrollment	Informed Consent		Focus Group											general public		Major focus	Yes	NC	Yes	AA, W						NR	35	No	Yes	No	Participants discussed privacy concerns about the handling of personal information and blood. Participants wanted transparent communication about who would have access to their data...Participants also wanted explicit assurances that their personal information would be protected, particularly regarding how their blood was handled after the study. If these privacy concerns were addressed, the majo…
25735479	fair	322	A. Husedzinovic, D. Ose, C. Schickhardt, S. Frohling and E. C. Winkler. Stakeholders' perspectives on biobank-based genomic research: systematic review of the literature. Eur J Hum Genet. 2015. 23:1607-14	2015	Biobanking/Specimen donation							Systematic review or meta-analysis									Minor focus	NA	NA	NA	NA						NA	NA	NA
24646408	fair	31	A. Khan, B. J. Capps, M. Y. Sum, C. N. Kuswanto and K. Sim. Informed consent for human genetic and genomic studies: a systematic review. Clin Genet. 2014. 86:199-206	2014	Informed consent	Data sharing						Systematic review or meta-analysis									Minor focus	NA	NA	NA	NA						NA	NA	NA
22333900	good	3699	L. Goldsmith, L. Jackson, A. O'Connor and H. Skirton. Direct-to-consumer genomic testing: systematic review of the literature on user perspectives. European Journal of Human Genetics. 2012. 20:811-816	2012	Genetic testing (DTC)							Systematic review or meta-analysis									Minor focus	NA	NA	NA	NA						NA	NA	NA
red=systematic reviews not used in manuscript
